# Supplementary material
Source: Springer Nature journal article supplement (https://www.springermedizin.de/resource/supplementary/12889_2010_3125_MOESM1_ESM.pdf/9488100)
Supplement: MOESM1 [file 9488100]

## **ISAAC Phase Two**

before entering puberty  
(9-11 years)

## **SOLAR I**

before/at start of  
employment  
(16-18 years)

## **SOLAR II**

career/studies  
(19-24 years)

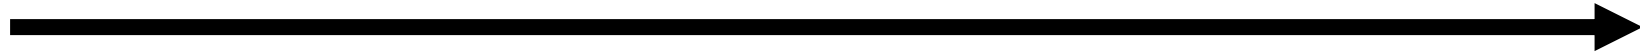

**1995/1996**

**Questionnaire**

**Clinical examination**

Spirometry

BHR\* (saline)

Skin prick test

Blood sample

**2002-2003**

**Questionnaire**

**2007-2009**

**Questionnaire**

**Clinical examination**

Spirometry

BHR\* (methacholine)

Skin prick test

Patch test

FeNO\*\*

Blood sample
